# Supplementary material for: Population Dynamics of Metastable Growth-Rate Phenotypes
Source: PubMed Central journal article supplement (PMC3847162; doi:10.1371/journal.pone.0081671), 2013-12-02
Supplement: pone.0081671.s008.pdf [file pone.0081671.s008.pdf]

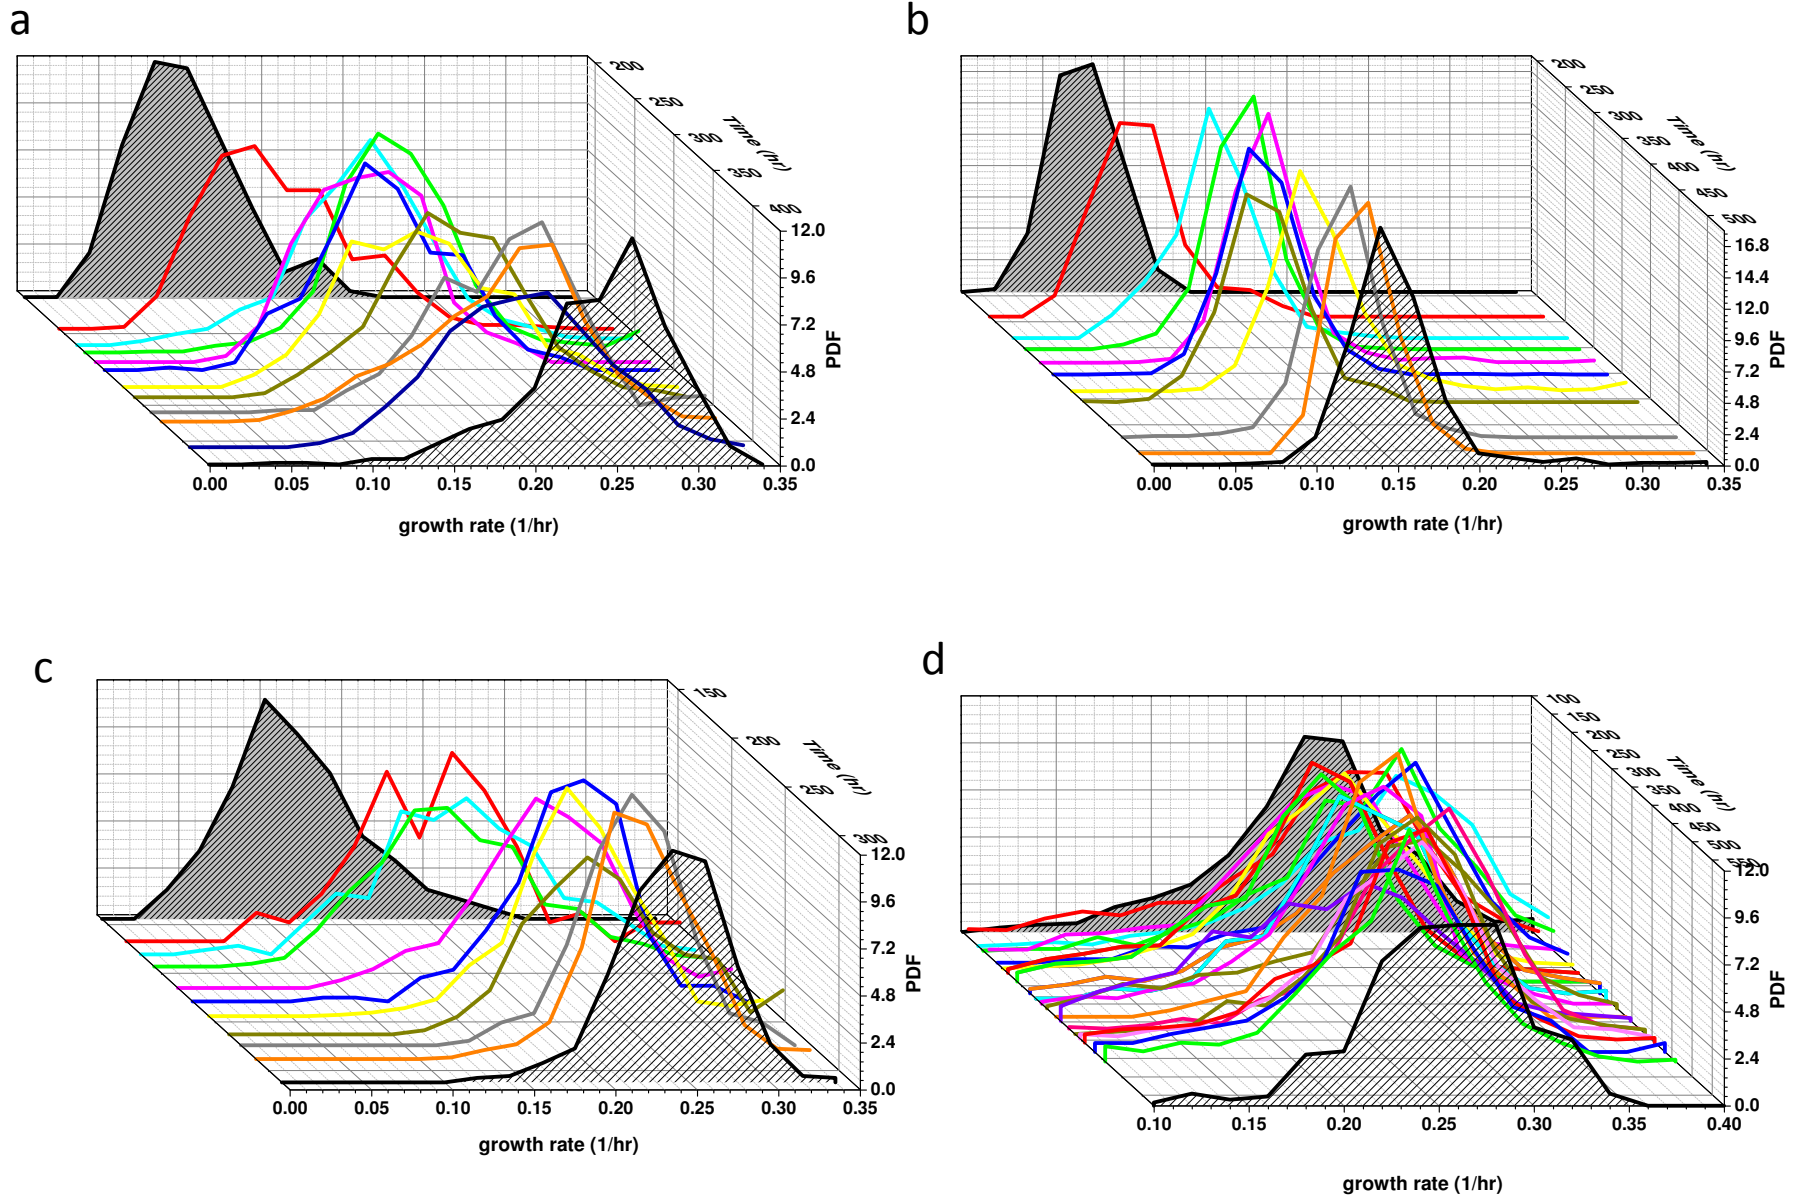

Fig. S8
